# Supplementary material
Source: PubMed Central journal article supplement (PMC6740190)
Supplement: ao9b01684_si_001.pdf [file ao9b01684_si_001.pdf]

# **Cobalt(II) Diphenylazodioxide Complexes Induce Apoptosis in SK-HEP-1 Cells**

Norah J. Alghamdi,<sup>†,‡,#</sup> Lakshmi Balaraman,<sup>†</sup> Kylin A. Emhoff,<sup>†</sup> Ahmed M. H. Salem,<sup>†</sup> Ruhan Wei,<sup>†,‡</sup> Aimin Zhou,<sup>\*†,‡</sup> and W. Christopher Boyd<sup>\*†</sup>

<sup>†</sup>Department of Chemistry, Cleveland State University, 2121 Euclid Avenue, Cleveland, Ohio 44114.

<sup>‡</sup>Center for Gene Regulation in Health and Disease (GRHD), Cleveland State University, 2121 Euclid Avenue, Cleveland, Ohio 44114.

## **Supporting Information**

## Contents

|   |                                                                                                    | Page |
|---|----------------------------------------------------------------------------------------------------|------|
| 1 | <b>Effect of cobalt(II) diphenylazodioxide complexes on PARP cleavage of additional cell lines</b> | S2   |
| 2 | <b>HPLC chromatograms of cobalt(II) azodioxide complexes</b>                                       | S4   |
| 3 | <b>References</b>                                                                                  | S5   |
|   | End                                                                                                | S5   |

### 1. Effect of cobalt(II) diphenylazodioxide complexes on PARP cleavage of additional cell lines

HEK 293, HT-29, MCF-7, and PC-3 cells were subjected to treatment for 12 h with each of compounds **1** and **2** at 2  $\mu$ M and 10  $\mu$ M concentrations, and western blots were used to assess the cleavage of PARP, as a marker of apoptosis. Figures S1-S4 below show that compounds **1** and **2** did not induce extensive PARP cleavage compared with the DMSO vehicle control in these cell lines.

#### HEK 293 cells (12 h treatment)

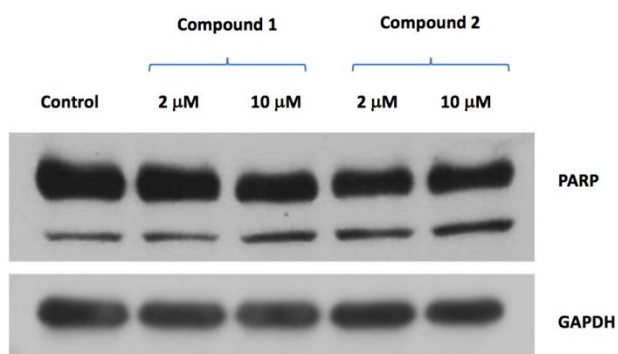

**Figure S1.** Effect of compounds **1** and **2** on PARP cleavage in HEK 293 cells.

## HT-29 cells (12 h treatment)

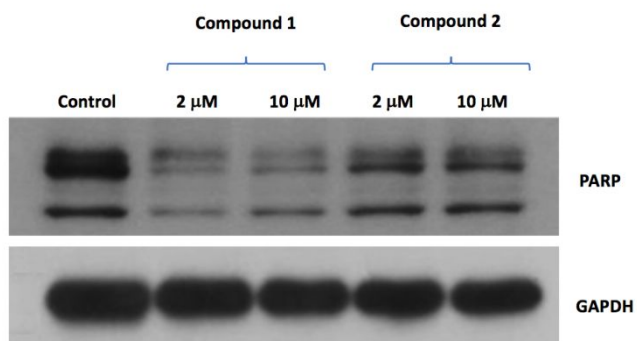

**Figure S2.** Effect of compounds 1 and 2 on PARP cleavage in HT-29 cells.

## MCF-7 cells (12 h treatment)

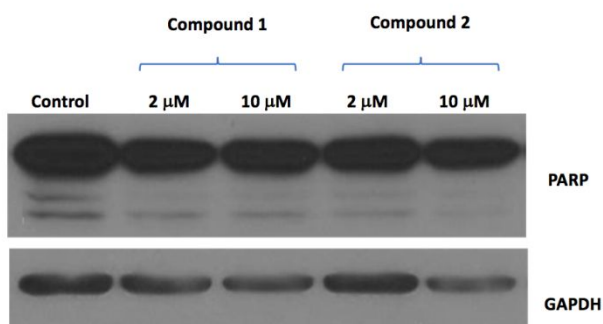

**Figure S3.** Effect of compounds 1 and 2 on PARP cleavage in MCF-7 cells.

## PC-3 cells (12 h treatment)

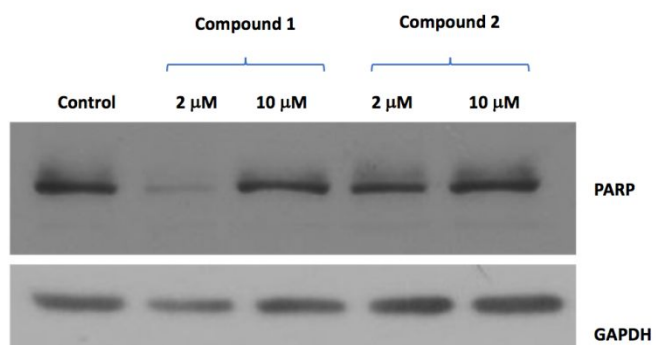

**Figure S4.** Effect of compounds 1 and 2 on PARP cleavage in PC-3 cells.

## 2. HPLC chromatograms of cobalt(II) diphenylazodioxide complexes

HPLC analysis of compounds **1** and **2** was performed, supplementing the characterization provided in the initial report of these compounds.<sup>1</sup> The analyses were performed on a Shimadzu LC20 HPLC with a 190-320 nm UV detector. The compounds were eluted on a reverse-phase C<sub>18</sub> column (Waters Corporation), with an isocratic mobile phase of pure acetonitrile. Figure S5 below shows chromatograms of compound **1** with detection wavelengths of 246 and 304 nm, and Figure S6 shows the chromatogram of compound **2** with detection wavelengths of 282 and 305 nm. The product peak area is seen to be >98% of the total in all cases.

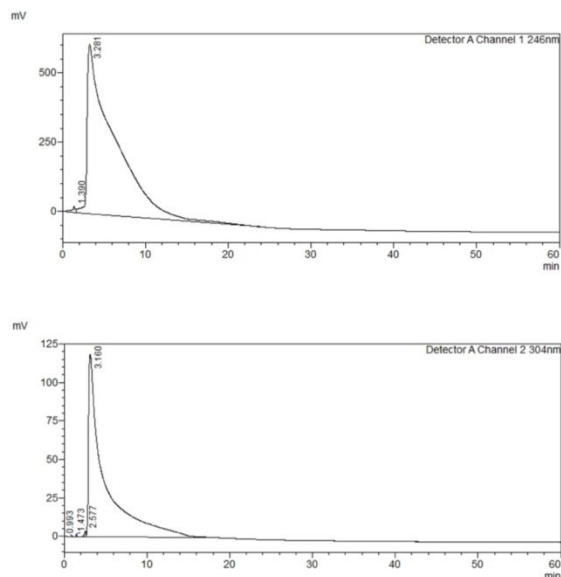

Peaks from wavelength 246 nm

| Peak# | Ret. Time | Area      | Height | Area%   |
|-------|-----------|-----------|--------|---------|
| 1     | 1.390     | 679276    | 22502  | 0.494   |
| 2     | 3.281     | 136777955 | 609136 | 99.506  |
| Total |           | 137457231 | 631638 | 100.000 |

Peaks from wavelength 304 nm

| Peak# | Ret. Time | Area     | Height | Area%   |
|-------|-----------|----------|--------|---------|
| 1     | 0.993     | 1080     | 164    | 0.007   |
| 2     | 1.473     | 13887    | 1790   | 0.090   |
| 3     | 2.577     | 55736    | 4035   | 0.361   |
| 4     | 3.160     | 15370264 | 118298 | 99.542  |
| Total |           | 15440967 | 124287 | 100.000 |

**Figure S5.** Chromatograms of compound **1** at 246 and 304 nm detection wavelengths.

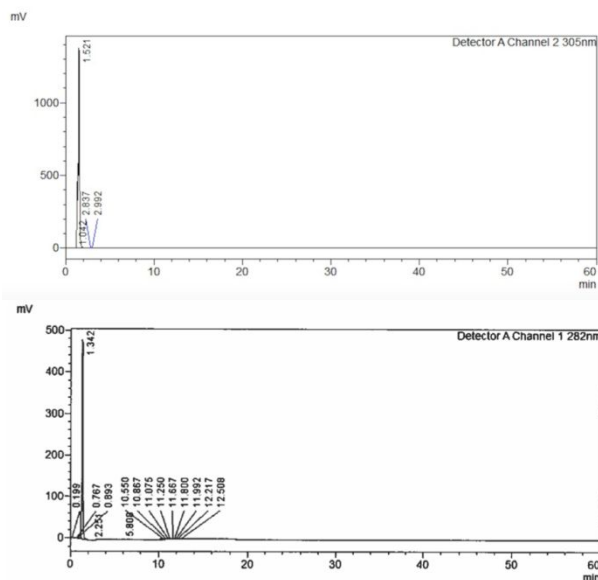

Peaks from wavelength 305 nm

| Peak# | Ret. Time | Area     | Height  | Area%   |
|-------|-----------|----------|---------|---------|
| 1     | 1.042     | 4806     | 540     | 0.030   |
| 2     | 1.521     | 15816686 | 1378967 | 99.933  |
| 3     | 2.837     | 4179     | 202     | 0.026   |
| 4     | 2.992     | 1617     | 150     | 0.010   |
| Total |           | 15827288 | 1379659 | 100.000 |

Peaks from wavelength 282 nm

| Peak# | Ret. Time | Area    | Height | Area%   |
|-------|-----------|---------|--------|---------|
| 1     | 0.199     | 1484    | 135    | 0.043   |
| 2     | 0.767     | 6739    | 804    | 0.195   |
| 3     | 0.893     | 16359   | 1534   | 0.473   |
| 4     | 1.342     | 3417463 | 479303 | 98.721  |
| 5     | 2.251     | 2288    | 233    | 0.066   |
| 6     | 5.808     | 1683    | 79     | 0.049   |
| 7     | 10.550    | 4029    | 127    | 0.116   |
| 8     | 10.867    | 1690    | 128    | 0.049   |
| 9     | 11.075    | 1280    | 127    | 0.037   |
| 10    | 11.250    | 1953    | 124    | 0.058   |
| 11    | 11.667    | 1773    | 123    | 0.051   |
| 12    | 11.800    | 1268    | 128    | 0.037   |
| 13    | 11.992    | 1275    | 125    | 0.037   |
| 14    | 12.217    | 1117    | 110    | 0.032   |
| 15    | 12.508    | 1299    | 94     | 0.038   |
| Total |           | 3461739 | 483172 | 100.000 |

**Figure S6.** Chromatograms of compound **2** at 282 and 305 nm detection wavelengths.

### 3. References

1. Emhoff, K. A.; Balaraman, L.; Simpson, S. R.; Stromyer, M. L.; Kalil, H. F.; Beemiller, J. R.; Sikatzki, P.; Eshelman, T. S.; Salem, A. M. H.; DeBord, M. A.; Panzner, M. J.; Youngs, W. J.; Boyd, W. C. Synthesis and Characterization of Cobalt(II) *N,N'*-Diphenylazodioxide Complexes. *ACS Omega* **2018**, *3*, 16021-16027.
